# Supplementary material for: HMGB3 Targeted by miR-145-5p Impacts Proliferation, Migration, Invasion, and Apoptosis of Breast Cancer Cells
Source: Hindawi journal article supplement (doi:10.1155/2022/1954099), 2022-11-10
Supplement: f1 [file 1954099.f1.zip]

Archive with 2 entries (2 files):
- Supplementary Figure (1).pdf
- Supplementary Figure.docx
