# Supplementary figures and images for: HMGB3 Targeted by miR-145-5p Impacts Proliferation, Migration, Invasion, and Apoptosis of Breast Cancer Cells
Source: Hindawi journal article supplement (doi:10.1155/2022/1954099), 2022-11-10

**A**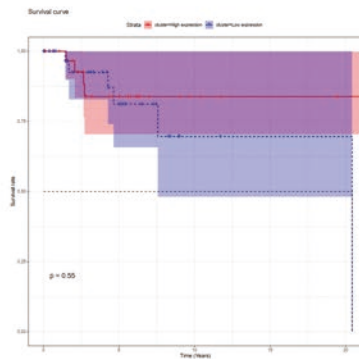**Basal-like****B**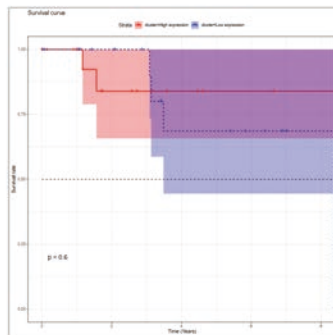**Her2E****C**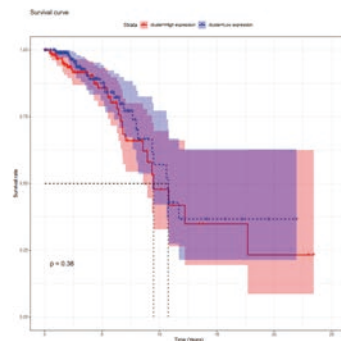**LumA****D**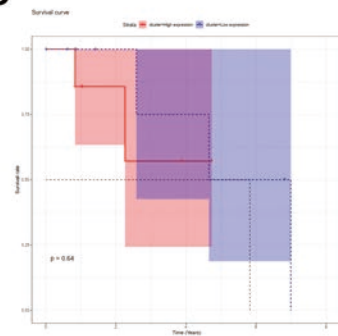**LumB****E**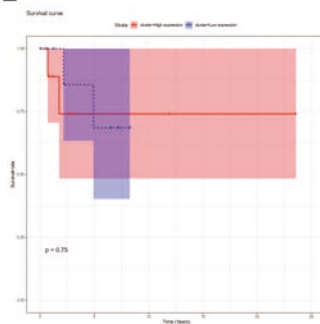**Normal-like**

Supplement: f1 [file 1954099.f1.zip]

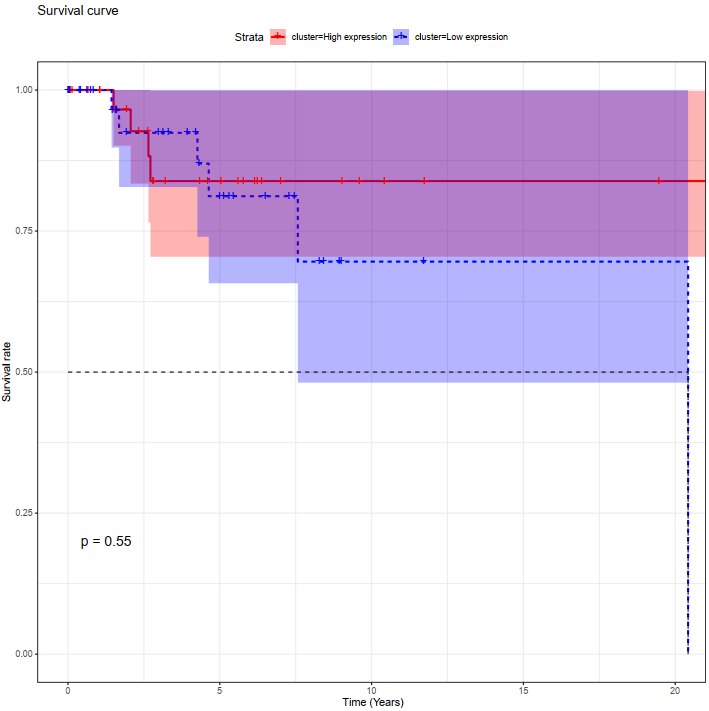

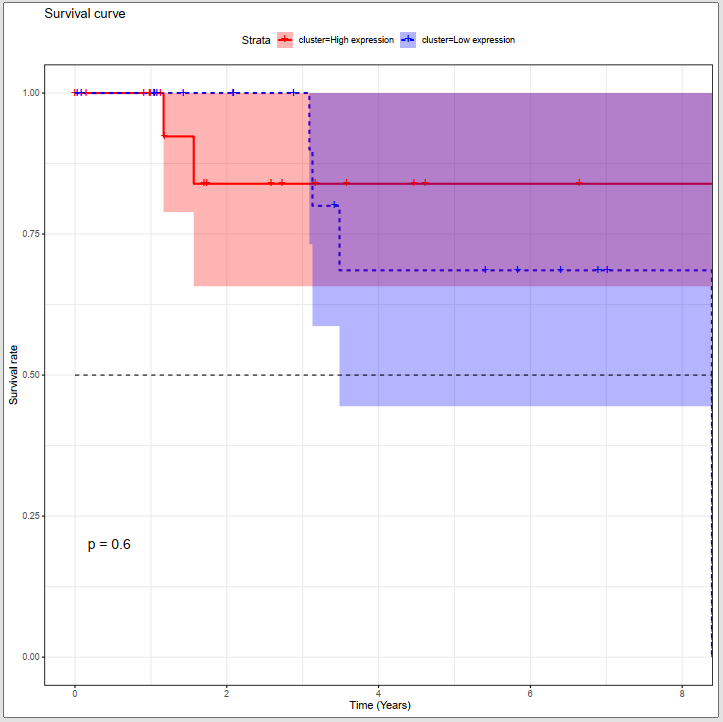

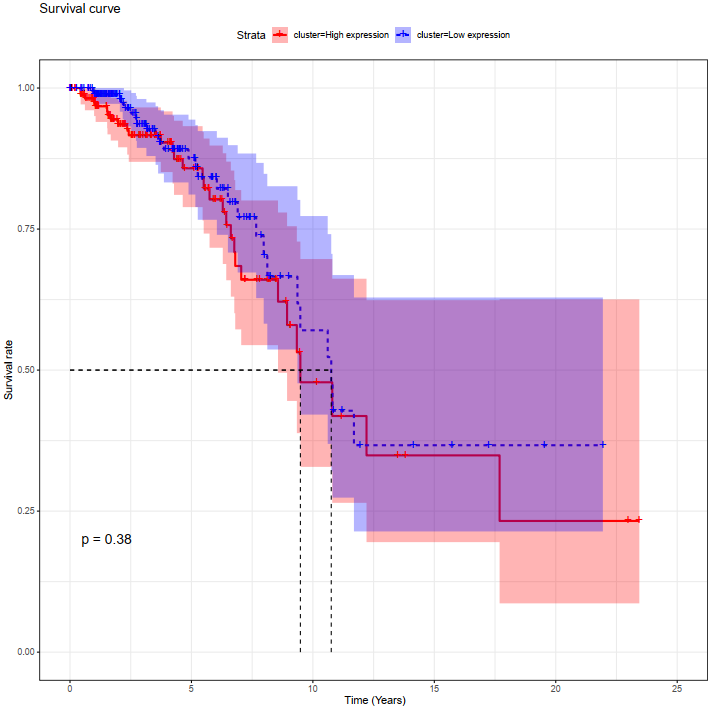

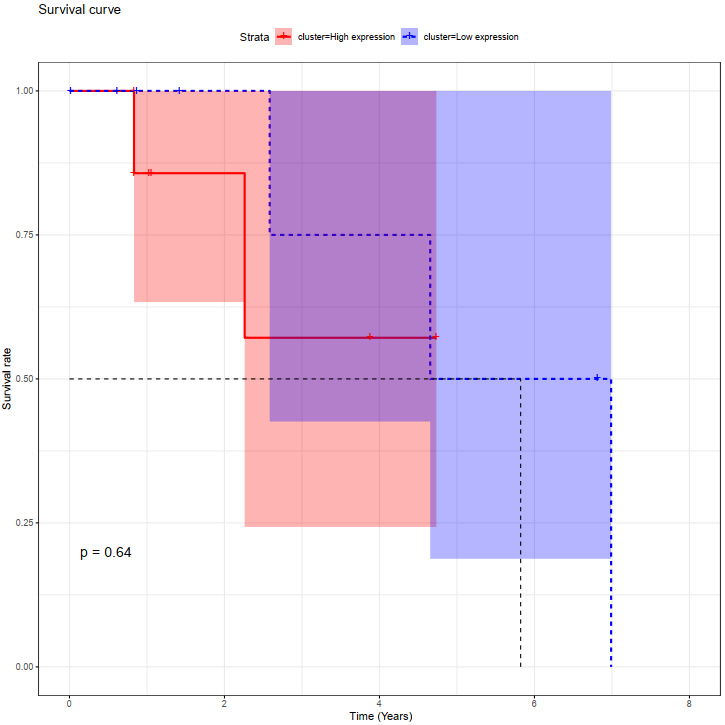

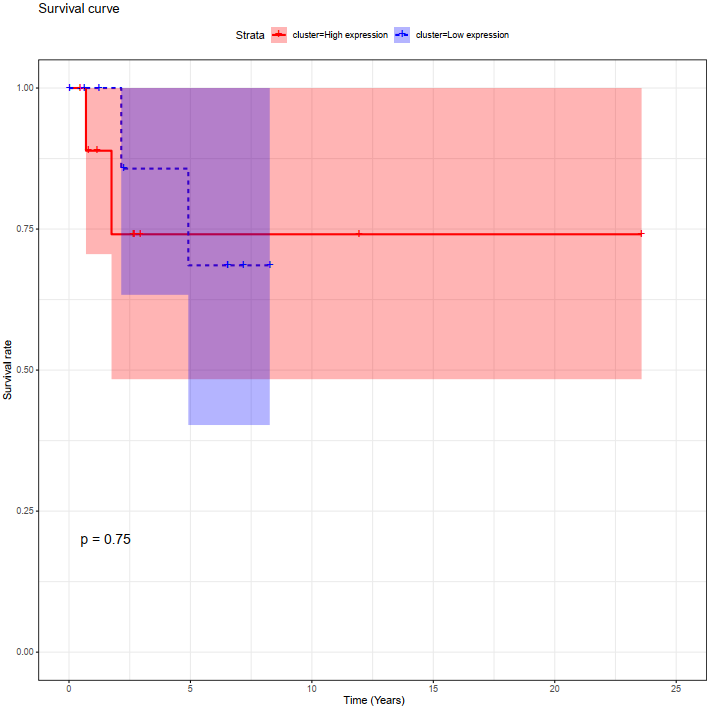


Basal-like

Her2E

LumA

LumB

Normal-like

**Supplementary Figure**

**A**

**C**

**B**

**D**

**E**

Supplement: f1 [file 1954099.f1.zip › Supplementary Figure.docx]
